# Supplementary figures and images for: A Study on PHF-Tau Network Effected by Apolipoprotein E4
Source: PubMed Central journal article supplement — Am J Alzheimers Dis Other Demen. 2020 Dec 1;35:1533317520971414. doi: 10.1177/1533317520971414 (PMC10623995; doi:10.1177/1533317520971414), 2020-12-01

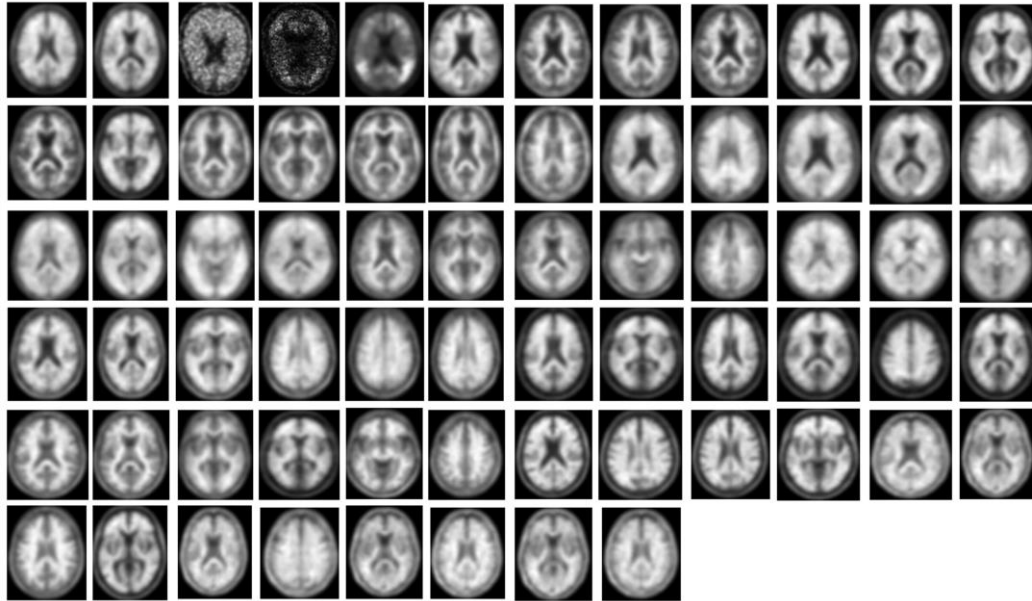

Supplement 1. All the subjects of APOE 4 carriers.

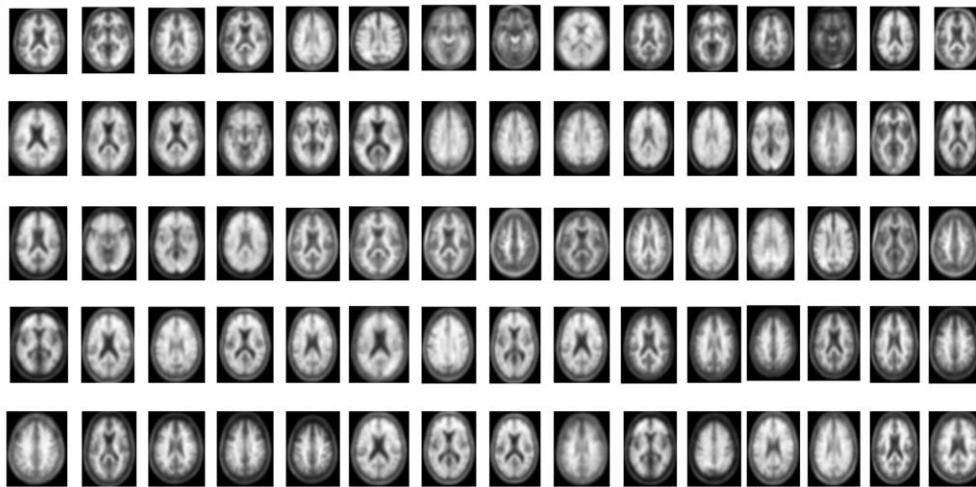

Supplement 1. All the subjects of APOE 4 noncarriers.

Supplement: sj-pdf-1-aja-10.1177_1533317520971414.pdf [file sj-pdf-1-aja-10.1177_1533317520971414.pdf]
